# Supplementary material
Source: PubMed Central journal article supplement (PMC4762194)
Supplement: NIHMS66548-supplement-Supplementary_Figures___Tables.pdf [file NIHMS66548-supplement-Supplementary_Figures___Tables.pdf]

## Supplementary Tables and Figures

### Hilvo et al., *Accumulated metabolites of hydroxybutyric acid serve as diagnostic and prognostic biomarkers of ovarian high-grade serous carcinomas*

#### CONTENTS

|                                                                  |           |
|------------------------------------------------------------------|-----------|
| <b>1 CLINICOPATHOLOGICAL DATA</b> .....                          | <b>2</b>  |
| <b>1.1 Supplementary Tables</b> .....                            | <b>2</b>  |
| Supplementary Table S1 .....                                     | 2         |
| <b>2 METABOLOMICS RESULTS</b> .....                              | <b>3</b>  |
| <b>2.1 Supplementary Tables</b> .....                            | <b>3</b>  |
| Supplementary Table S2 .....                                     | 3         |
| Supplementary Table S3 .....                                     | 3         |
| Supplementary Table S4 .....                                     | 4         |
| Supplementary Table S5 .....                                     | 4         |
| Supplementary Table S6 .....                                     | 4         |
| <b>2.2 Supplementary Figures</b> .....                           | <b>5</b>  |
| Supplementary Figure S1 .....                                    | 5         |
| Supplementary Figure S2 .....                                    | 6         |
| Supplementary Figure S3 .....                                    | 6         |
| Supplementary Figure S4 .....                                    | 7         |
| Supplementary Figure S5 .....                                    | 7         |
| Supplementary Figure S6 .....                                    | 8         |
| <b>3 GENE EXPRESSION AND COPY NUMBER SURVIVAL ANALYSES</b> ..... | <b>9</b>  |
| <b>3.1 Supplementary Tables</b> .....                            | <b>9</b>  |
| Supplementary Table S7 .....                                     | 9         |
| Supplementary Table S8 .....                                     | 10        |
| <b>4 GENE SET ENRICHMENT ANALYSES</b> .....                      | <b>11</b> |
| <b>4.1. Supplementary Tables</b> .....                           | <b>11</b> |
| Supplementary Table S9 .....                                     | 11        |
| Supplementary Table S10 .....                                    | 11        |

# 1 CLINICOPATHOLOGICAL DATA

## 1.1 Supplementary Tables

Supplementary Table S1. Clinicopathological characteristics of the study cohort.

|                                          |                           | Serum samples |      | Tumor samples |      |
|------------------------------------------|---------------------------|---------------|------|---------------|------|
|                                          |                           | Cases         | %    | Cases         | %    |
| <b>All patients</b>                      |                           |               |      |               |      |
| <i>Malignancy</i>                        | malignant cases           | 158           | 61 % | 124           | -    |
|                                          | non-malignant cases       | 100           | 39 % | -             | -    |
| <i>CA-125 data measured</i>              | malignant cases           | 145           | 92 % | -             | -    |
|                                          | non-malignant cases       | 73            | 73 % | -             | -    |
| <b>Patients with malign tumors</b>       |                           |               |      |               |      |
| <i>Figo stage</i>                        | I                         | 3             | 2 %  | 3             | 2 %  |
|                                          | II                        | 5             | 3 %  | 4             | 3 %  |
|                                          | III                       | 101           | 64 % | 83            | 67 % |
|                                          | IV                        | 32            | 20 % | 24            | 19 % |
|                                          | NA                        | 17            | 11 % | 10            | 8 %  |
| <i>Residual tumor mass in surgery</i>    | complete reduction        | 91            | 58 % | 75            | 60 % |
|                                          | < 0.5 cm                  | 31            | 20 % | 24            | 19 % |
|                                          | < 1 cm                    | 21            | 13 % | 18            | 15 % |
|                                          | < 2 cm                    | 2             | 1 %  | 2             | 2 %  |
|                                          | > 2 cm                    | 7             | 4 %  | 4             | 3 %  |
|                                          | NA                        | 6             | 4 %  | 1             | 1 %  |
| <i>Location of analyzed tumor sample</i> | ovary                     | -             | -    | 59            | 48 % |
|                                          | intestine                 | -             | -    | 23            | 19 % |
|                                          | peritoneum                | -             | -    | 14            | 11 % |
|                                          | other                     | -             | -    | 26            | 21 % |
|                                          | NA                        | -             | -    | 2             | 2 %  |
| <i>Ascites</i>                           | 1                         | 31            | 20 % | 24            | 19 % |
|                                          | 2                         | 57            | 36 % | 50            | 40 % |
|                                          | 3                         | 64            | 41 % | 50            | 40 % |
|                                          | NA                        | 6             | 4 %  | 0             | 0 %  |
| <i>Progress-free survival</i>            | event                     | 88            | 58 % | 64            | 52 % |
|                                          | median follow-up (months) | 16            | -    | 16            | -    |
|                                          | no event                  | 64            | 42 % | 60            | 48 % |
|                                          | median follow-up (months) | 25            | -    | 23            | -    |
| <i>Overall survival</i>                  | event                     | 84            | 55 % | 77            | 62 % |
|                                          | median follow-up (months) | 23            | -    | 22            | -    |
|                                          | no event                  | 68            | 45 % | 47            | 38 % |
|                                          | median follow-up (months) | 48            | -    | 49            | -    |

## 2 METABOLOMICS RESULTS

### 2.1 Supplementary Tables

Supplementary Table S2. Results of statistical tests for all metabolites in serum samples (provided as a separate excel file).

Supplementary Table S3. Malignant vs. control group t-test results for the main identified metabolite peaks.

| Metabolite name                | p-value  | q-value  | log2 fold | Metabolite name                               | p-value  | q-value  | log2 fold |
|--------------------------------|----------|----------|-----------|-----------------------------------------------|----------|----------|-----------|
| <b>Amino acids</b>             |          |          |           | <b>Fatty acid omega oxidation</b>             |          |          |           |
| Tryptophan                     | 7.91E-25 | 6.73E-23 | -1.64     | Adipic acid                                   | 1.86E-07 | 4.53E-07 | 0.52      |
| Alanine                        | 6.74E-20 | 9.56E-19 | -0.81     | <b>Glycolysis &amp; TCA cycle</b>             |          |          |           |
| Methionine                     | 1.05E-17 | 8.48E-17 | -0.43     | Lactic acid                                   | 7.90E-12 | 3.28E-11 | -0.54     |
| Threonine                      | 3.59E-16 | 2.35E-15 | -0.62     | Malic acid                                    | 7.24E-05 | 1.12E-04 | -0.51     |
| Proline                        | 2.90E-05 | 4.80E-05 | -0.30     | Glycerol-3-phosphate                          | 2.32E-03 | 2.49E-03 | -0.30     |
| Serine                         | 5.65E-04 | 7.02E-04 | -0.23     | <b>Ketone bodies and hydroxybutyric acids</b> |          |          |           |
| Phenylalanine                  | 6.13E-04 | 7.51E-04 | -0.25     | 3,4-Dihydroxybutyric acid                     | 5.65E-27 | 9.61E-25 | 0.87      |
| Glycine                        | 1.24E-03 | 1.41E-03 | 0.32      | 3-Hydroxybutyric acid                         | 6.06E-21 | 1.29E-19 | 2.53      |
| Tyrosine                       | 1.68E-03 | 1.85E-03 | -0.29     | 2,3,4-Trihydroxybutyric acid                  | 4.90E-12 | 2.14E-11 | -0.77     |
| Glutamic acid                  | 2.87E-03 | 3.00E-03 | 0.38      | 2-Hydroxybutyric acid                         | 4.32E-10 | 1.50E-09 | 0.69      |
| Glutamine                      | 7.02E-03 | 6.68E-03 | 0.46      | Acetoacetic acid                              | 5.60E-04 | 7.01E-04 | 1.21      |
| Valine                         | 8.45E-03 | 7.77E-03 | -0.12     | 2,4-Dihydroxybutyric acid                     | 1.05E-03 | 1.22E-03 | 0.28      |
| <b>Amino acid metabolism</b>   |          |          |           | <b>Other</b>                                  |          |          |           |
| 2-oxo-3-methylpentanoic acid   | 5.62E-08 | 1.50E-07 | -0.77     | Ketoleucine                                   | 2.62E-19 | 2.98E-18 | -0.89     |
| Indole-3-acetic acid           | 1.42E-07 | 3.56E-07 | -1.11     | Glycerol                                      | 2.44E-13 | 1.12E-12 | 0.74      |
| 2-Oxoisovaleric acid           | 3.41E-05 | 5.47E-05 | -0.69     | Myo-Inositol                                  | 1.34E-07 | 3.41E-07 | 0.41      |
| 2-Hydroxy-3-methylvaleric acid | 3.21E-03 | 3.31E-03 | -0.62     | Ethanolamine                                  | 8.03E-07 | 1.87E-06 | 0.50      |
| 4-Hydroxyphenyllactic acid     | 1.55E-02 | 1.30E-02 | 0.22      | Cholesterol                                   | 1.20E-06 | 2.65E-06 | -0.53     |
| <b>Carbohydrates</b>           |          |          |           | 2-Aminobutyric acid                           | 1.52E-06 | 3.32E-06 | -1.10     |
| Maltose                        | 1.65E-23 | 9.38E-22 | 3.90      | 3-Hydroxyvaleric acid                         | 7.03E-06 | 1.38E-05 | 0.89      |
| Turanose                       | 8.22E-23 | 3.50E-21 | 2.59      | Erythritol                                    | 2.82E-05 | 4.75E-05 | 0.33      |
| Melibiose                      | 2.86E-15 | 1.68E-14 | 2.87      | Maleic acid                                   | 1.20E-04 | 1.79E-04 | 0.56      |
| Mannonic acid                  | 9.66E-14 | 4.98E-13 | 0.68      | 3-Hydroxyisovaleric acid                      | 1.27E-04 | 1.89E-04 | 1.01      |
| Xylitol                        | 4.61E-09 | 1.51E-08 | 0.35      | Glyceric acid                                 | 2.00E-04 | 2.84E-04 | -0.35     |
| Arabinose                      | 1.75E-06 | 3.78E-06 | 0.68      | 3-Hydroxycaproic acid                         | 2.99E-04 | 3.97E-04 | 0.59      |
| Glucopyranose                  | 1.14E-02 | 1.01E-02 | 0.34      |                                               |          |          |           |
| Mannopyranose                  | 1.75E-02 | 1.46E-02 | 0.44      |                                               |          |          |           |
| Xylose                         | 3.74E-02 | 2.77E-02 | 0.37      |                                               |          |          |           |
| <b>Free fatty acids</b>        |          |          |           |                                               |          |          |           |
| Linolenic acid (C18:3)         | 1.33E-05 | 2.46E-05 | 0.63      |                                               |          |          |           |
| Palmitelaidic acid (C16:1)     | 4.20E-04 | 5.42E-04 | 0.37      |                                               |          |          |           |
| Oleic acid (C18:1)             | 7.90E-04 | 9.52E-04 | 0.27      |                                               |          |          |           |
| Myristic acid (C14:0)          | 6.28E-03 | 6.01E-03 | 0.27      |                                               |          |          |           |
| Myristoleic acid (C14:1)       | 1.37E-02 | 1.17E-02 | 0.42      |                                               |          |          |           |
| Palmitic acid (C16:0)          | 1.84E-02 | 1.52E-02 | 0.12      |                                               |          |          |           |
| Lauric acid (C12:0)            | 3.70E-02 | 2.76E-02 | 0.22      |                                               |          |          |           |

**Supplementary Table S4. Results of statistical tests regarding serum metabolites and nutrition (provided as a separate excel file).**

**Supplementary Table S5. Correlation of metabolite concentrations between serum and tissue samples.** Identified main metabolite peaks that showed significant results in Pearson correlation analysis when serum and tumor tissue samples were compared.

| Metabolite                 | Metabolite class                       | p-value  | R2     |
|----------------------------|----------------------------------------|----------|--------|
| 3-Hydroxybutyric acid      | Ketone bodies and hydroxybutyric acids | <2.4E-13 | 0.722  |
| 2-Hydroxybutyric acid      | Ketone bodies and hydroxybutyric acids | 2.4E-13  | 0.627  |
| Erythrotetrofuranose       | Sugars and sugar alcohols              | 3.2E-12  | 0.603  |
| Erythritol                 | Sugars and sugar alcohols              | 1.3E-09  | 0.538  |
| 3,4-Dihydroxybutyric acid  | Ketone bodies and hydroxybutyric acids | 0.001    | 0.317  |
| Isoleucine                 | Amino acids                            | 0.003    | 0.285  |
| 4-Hydroxyphenyllactic acid | Amino acid metabolism                  | 0.005    | 0.263  |
| 2,3-Dihydroxybutyric acid  | Ketone bodies and hydroxybutyric acids | 0.010    | 0.243  |
| Leucine                    | Amino acids                            | 0.012    | 0.238  |
| Valine                     | Amino acids                            | 0.014    | 0.233  |
| Maleic acid                | Other                                  | 0.018    | -0.226 |
| 3-Hydroxyisovaleric acid   | Other                                  | 0.025    | 0.214  |
| 2-Phenyllactic acid        | Amino acid metabolism                  | 0.025    | 0.214  |
| Adipic acid                | Fatty acid omega oxidation             | 0.027    | 0.211  |
| Palmitelaidic acid (C16:1) | Fatty acids                            | 0.029    | 0.208  |
| 2-Monopalmitin             | Other                                  | 0.029    | 0.208  |
| Glutamic acid              | Amino acids                            | 0.037    | 0.199  |
| 2,4-Dihydroxybutyric acid  | Ketone bodies and hydroxybutyric acids | 0.043    | 0.193  |

**Supplementary Table S6. Cox regression models with age, tumor reduction and figo stage incorporated into the model.** The upper and lower parts show a model with and without age, respectively.

| Metabolite name            | Metabolite   |              | Age          |              | Tumor reduction |              | Figo (III and IV) |              |
|----------------------------|--------------|--------------|--------------|--------------|-----------------|--------------|-------------------|--------------|
|                            | p-value      | hazard ratio | p-value      | hazard ratio | p-value         | hazard ratio | p-value           | hazard ratio |
| 2,4-Dihydroxybutyric acid  | 0.703        | 0.956        | <b>0.002</b> | 1.037        | <b>0.007</b>    | 0.637        | <b>4.6E-05</b>    | 3.045        |
| 3,4-Dihydroxybutyric acid  | 0.138        | 1.192        | <b>0.004</b> | 1.032        | <b>0.012</b>    | 0.654        | <b>3.3E-05</b>    | 3.140        |
| 3-Hydroxyisovaleric acid   | <b>0.003</b> | 1.317        | <b>0.003</b> | 1.032        | <b>0.005</b>    | 0.623        | <b>2.0E-05</b>    | 3.249        |
| 4-Hydroxyphenyllactic acid | 0.094        | 1.186        | <b>0.006</b> | 1.031        | <b>0.010</b>    | 0.646        | <b>8.8E-05</b>    | 2.944        |
| Adipic acid                | 0.094        | 1.224        | <b>0.004</b> | 1.032        | <b>0.004</b>    | 0.608        | <b>8.2E-05</b>    | 2.952        |
| Erythritol                 | 0.883        | 1.018        | <b>0.005</b> | 1.034        | <b>0.007</b>    | 0.635        | <b>4.7E-05</b>    | 3.047        |
| 2,4-Dihydroxybutyric acid  | 0.341        | 1.108        | -            | -            | <b>0.004</b>    | 0.617        | <b>0.000</b>      | 2.760        |
| 3,4-Dihydroxybutyric acid  | <b>0.025</b> | 1.263        | -            | -            | <b>0.007</b>    | 0.634        | <b>0.000</b>      | 2.832        |
| 3-Hydroxyisovaleric acid   | <b>0.001</b> | 1.334        | -            | -            | <b>0.006</b>    | 0.625        | <b>0.000</b>      | 2.950        |
| 4-Hydroxyphenyllactic acid | <b>0.009</b> | 1.287        | -            | -            | <b>0.011</b>    | 0.644        | <b>0.001</b>      | 2.532        |
| Adipic acid                | <b>0.021</b> | 1.306        | -            | -            | <b>0.002</b>    | 0.588        | <b>0.000</b>      | 2.645        |
| Erythritol                 | 0.099        | 1.194        | -            | -            | <b>0.005</b>    | 0.622        | <b>0.000</b>      | 2.732        |

## 2.2 Supplementary Figures

| Metabolite class     | AUC MEAN | 95% LOW | 95% HIGH | Metabolites in the model                                                |
|----------------------|----------|---------|----------|-------------------------------------------------------------------------|
| Hydroxybutyric acids | 0.90     | 0.86    | 0.95     | 3,4-Dihydroxybutyric acid, 3-Hydroxybutyric acid, 2-Hydroxybutyric acid |
| Amino acids          | 0.87     | 0.81    | 0.93     | Tryptophan, Alanine, Methionine                                         |
| Sugars               | 0.82     | 0.75    | 0.88     | Maltose, Turanose, Melibiose                                            |
| Random metabolites   | 0.66     | 0.49    | 0.85     | 3 Random metabolites selected 1000 times                                |
| Free fatty acids     | 0.64     | 0.55    | 0.64     | Linolenic acid (C18:3), Palmitelaidic acid (C16:1), Oleic acid (C18:1)  |

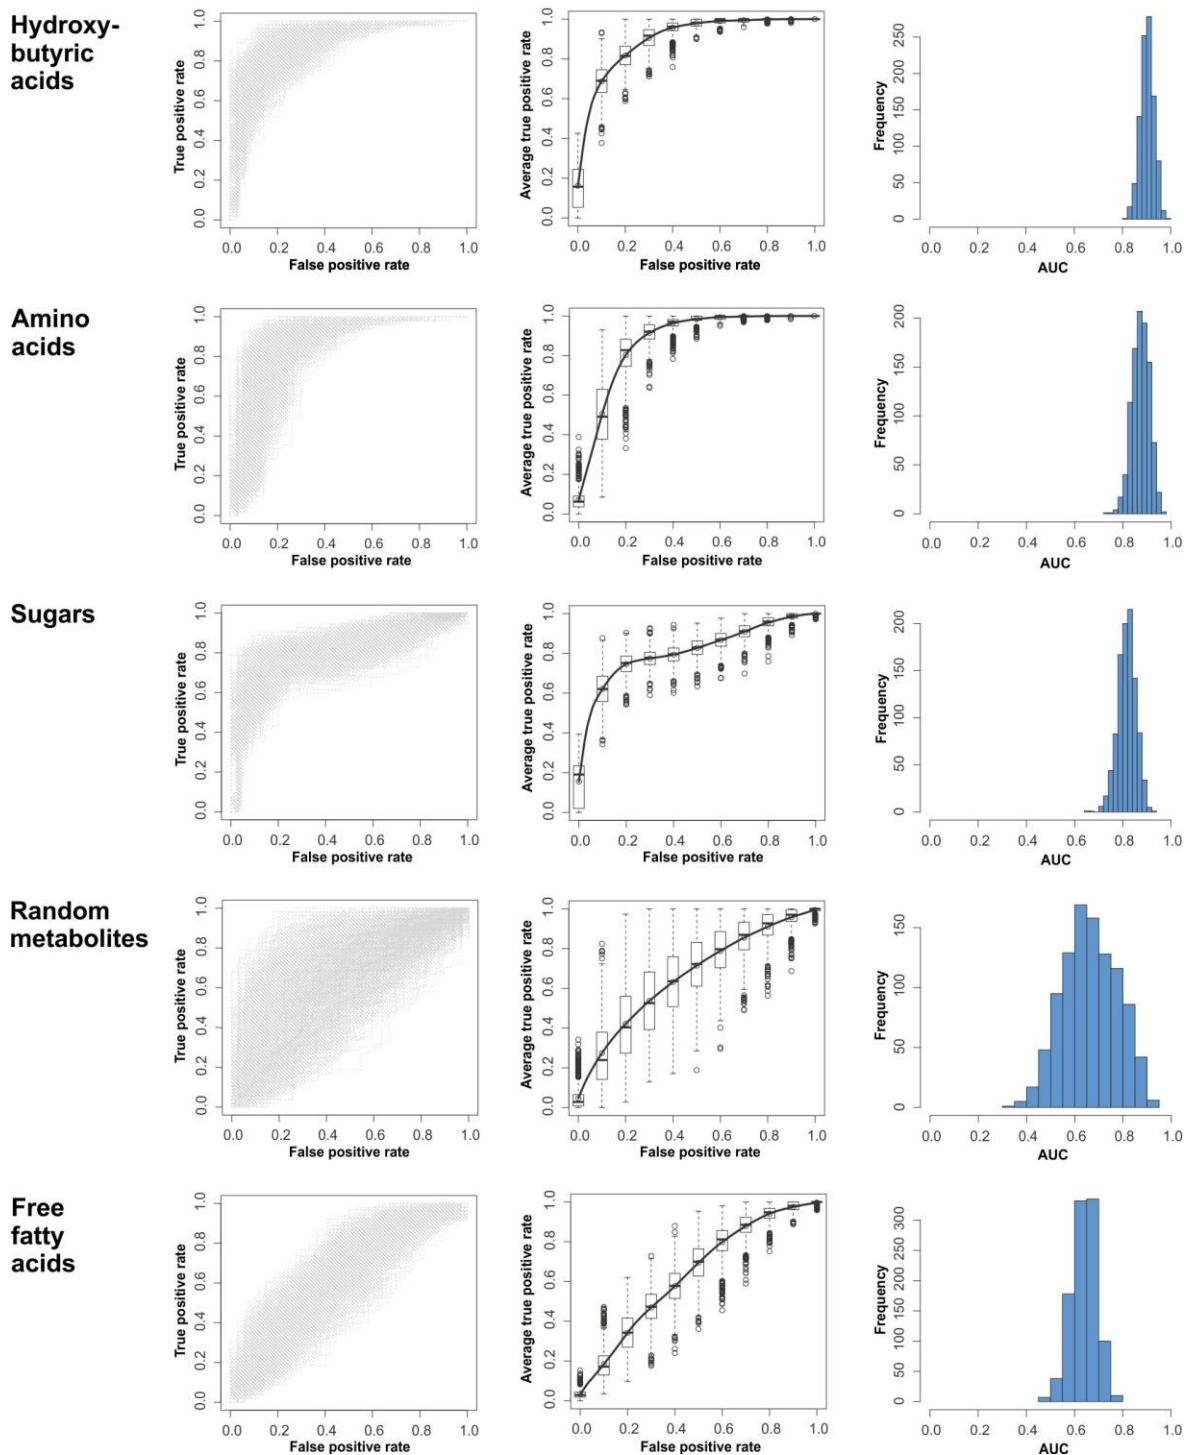

Supplementary Figure S1

**A**

| CA-125 | 3,4-DHBA | 3-HBA | 3 random metabolites | AUC               |
|--------|----------|-------|----------------------|-------------------|
| X      | X        | X     |                      | 0.98 (0.96, 1.00) |
| X      |          | X     |                      | 0.97 (0.95, 0.99) |
| X      | X        |       |                      | 0.97 (0.95, 0.99) |
| X      |          |       |                      | 0.96 (0.92, 0.99) |
|        | X        | X     |                      | 0.91 (0.86, 0.95) |
|        | X        |       |                      | 0.86 (0.80, 0.91) |
|        |          | X     |                      | 0.84 (0.77, 0.90) |
|        |          |       | X                    | 0.66 (0.48, 0.85) |

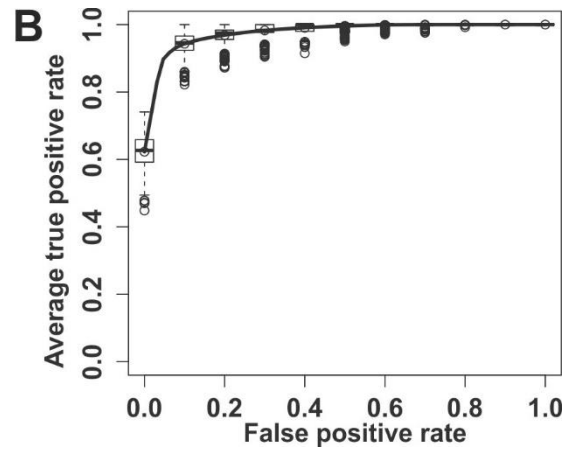

Supplementary Figure S2

**A**

| Metabolite name           | Metabolite class                       | p-value | q-value |
|---------------------------|----------------------------------------|---------|---------|
| 4-Hydroxyproline          | Amino acid metabolism                  | 0.004   | 0.226   |
| Methionine                | Amino acids                            | 0.013   | 0.287   |
| Glycylglycine             | Amino acid metabolism                  | 0.019   | 0.287   |
| Ribonic acid              | Sugars and sugar alcohols              | 0.025   | 0.299   |
| 2,3-Dihydroxybutyric acid | Ketone bodies and hydroxybutyric acids | 0.027   | 0.299   |
| Myristic acid (C14:0)     | Fatty acids                            | 0.028   | 0.299   |
| Tyrosine                  | Amino acids                            | 0.033   | 0.299   |
| Citric acid               | Glycolysis and TCA cycle               | 0.038   | 0.307   |

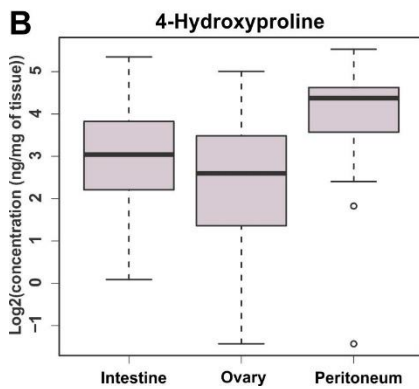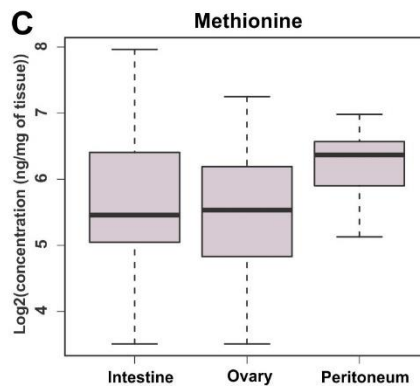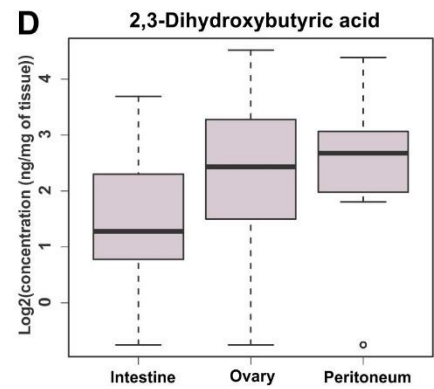

Supplementary Figure S3

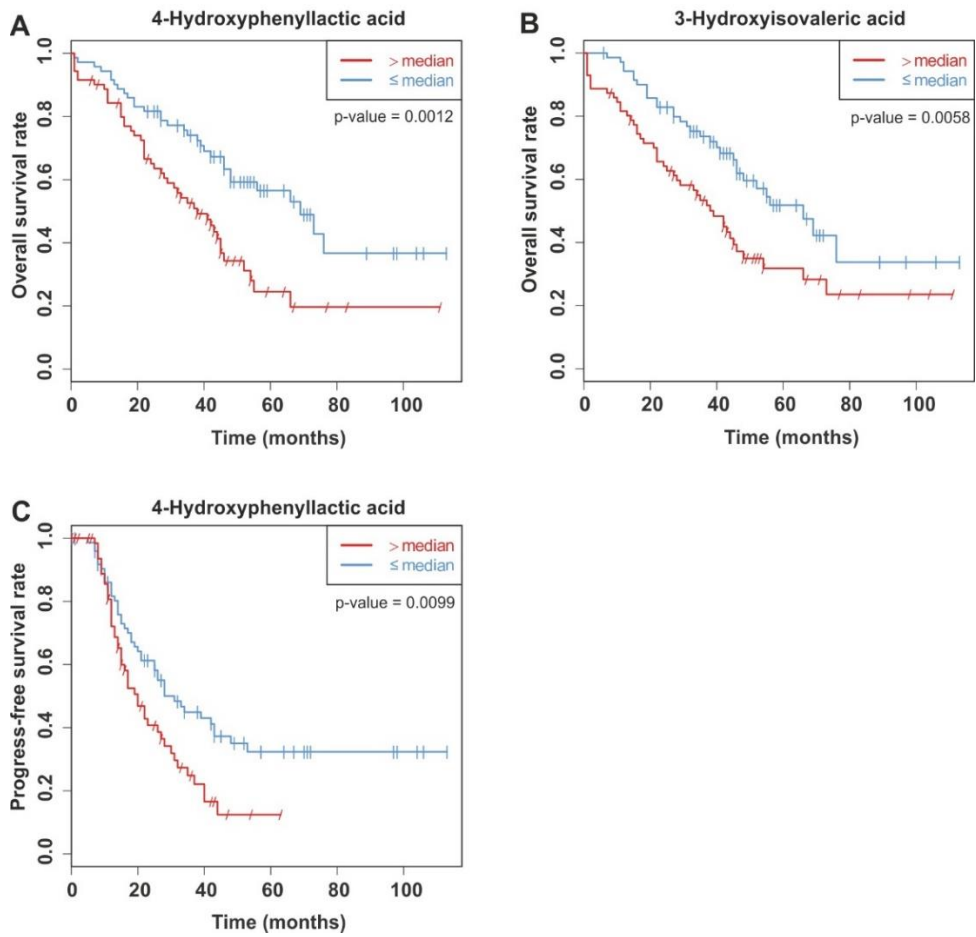

Supplementary Figure S4

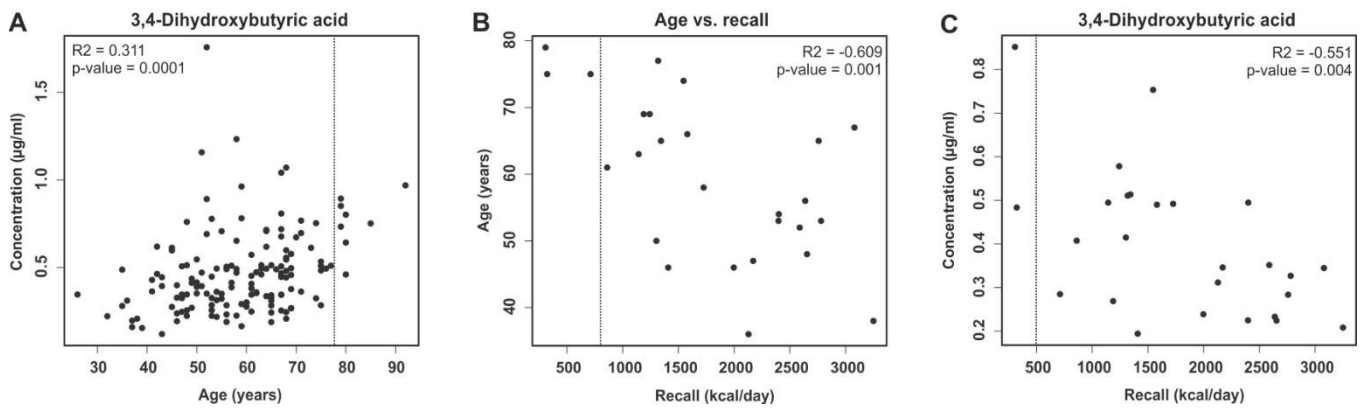

Supplementary Figure S5

**A**

| Metabolite                 | KM           | Cox regression |              |
|----------------------------|--------------|----------------|--------------|
|                            | p-value      | p-value        | hazard ratio |
| 3,4-Dihydroxybutyric acid  | <b>0.028</b> | 0.058          | 1.22         |
| Adipic acid                | 0.409        | 0.305          | 1.12         |
| Erythritol                 | 0.709        | <b>0.021</b>   | 1.35         |
| 3-Hydroxyisovaleric acid   | <b>0.048</b> | <b>0.017</b>   | 1.22         |
| 2,4-Dihydroxybutyric acid  | 0.162        | <b>0.001</b>   | 1.50         |
| 4-Hydroxyphenyllactic acid | 0.954        | 0.275          | 0.88         |

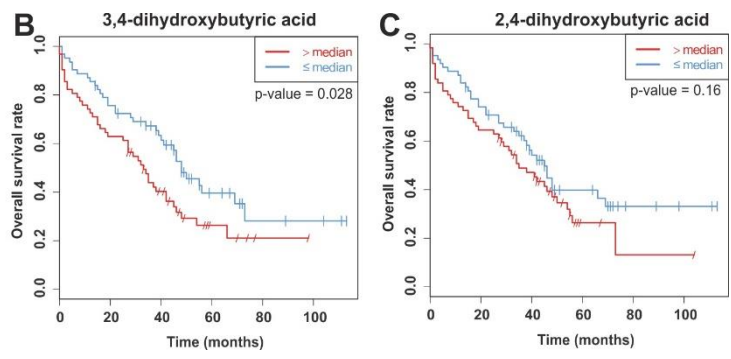**Supplementary Figure S6**



### 3 GENE EXPRESSION AND COPY NUMBER SURVIVAL ANALYSES

#### 3.1 Supplementary Tables

**Supplementary Table S7. Results of survival analyses in the TCGA data set.** In this table the results are summarized only for those genes whose low/high gene expression or gain/loss of copy number was associated with worse survival. The results for all analyzed genes (n=69) are shown in the **Supplementary Statistical Code**.

| Gene    | Enzyme                                           | Expression quartiles |                | CNA            |                |         |                                                                  |
|---------|--------------------------------------------------|----------------------|----------------|----------------|----------------|---------|------------------------------------------------------------------|
|         |                                                  | p-value              | Worse survival | p-value        | Worse survival | Percent | Deficiency / pathway related to                                  |
| ALDH5A1 | Succinic semialdehyde dehydrogenase              | <b>4.1E-04</b>       | Low            | <b>0.025</b>   | Loss           | 17.0 %  | SSADH deficiency                                                 |
| DLD     | Dihydrolipoamide dehydrogenase                   | <b>4.6E-04</b>       | High           | 0.120          | -              | -       | Leucine catabolism                                               |
| PEX6    | Peroxisomal biogenesis factor 6                  | <b>8.6E-04</b>       | Low            | 0.235          | -              | -       | Peroxisomal biogenesis, Zellweger syndrome                       |
| HMGCL   | 3-hydroxymethyl-3-methylglutaryl-CoA lyase       | <b>0.004</b>         | High           | 0.560          | -              | -       | Ketogenesis, leucine catabolism                                  |
| ACSL3   | Acyl-CoA Synthetase Long-Chain Family Member 3   | <b>0.009</b>         | High           | 0.137          | -              | -       | Activation of long-chain fatty acids for synthesis and oxidation |
| ADH1B   | Alcohol dehydrogenase 1B                         | <b>0.027</b>         | High           | 0.641          | -              | -       | Omega oxidation                                                  |
| HLCS    | Holocarboxylase synthetase                       | <b>0.029</b>         | Low            | 0.388          | -              | -       | Leucine catabolism                                               |
| AUH     | 3-methylglutaconyl hydratase                     | <b>0.033</b>         | High           | 0.093          | -              | -       | Leucine catabolism                                               |
| ALDH7A1 | Antiquitin                                       | <b>0.029</b>         | -              | <b>0.022</b>   | Gain           | 12.8 %  | Pipecolic acidemia, Zellweger syndrome                           |
| MCCC2   | Methylcrotonoyl-CoA carboxylase 2 (beta)         | 0.887                | -              | <b>1.7E-04</b> | Gain           | 2.9 %   | Leucine catabolism                                               |
| PEX12   | Peroxisomal biogenesis factor 12                 | 0.428                | -              | <b>3.1E-03</b> | Gain           | 3.2 %   | Peroxisomal biogenesis, Zellweger syndrome                       |
| OXCT1   | Succinyl-CoA:3-ketoacid-coenzyme A transferase 1 | 0.178                | -              | <b>0.004</b>   | Loss           | 10.3 %  | Ketogenesis                                                      |
| ALDH1B1 | Aldehyde dehydrogenase X, mitochondrial          | 0.217                | -              | <b>0.005</b>   | Loss           | 39.4 %  | Omega oxidation                                                  |
| EHHADH  | Peroxisomal bifunctional enzyme                  | 0.063                | -              | <b>0.010</b>   | Loss           | 3.8 %   | Peroxisomal oxidation of fatty acids, Zellweger syndrome         |
| HMGCS1  | 3-hydroxy-3-methylglutaryl-CoA synthase 1        | 0.082                | -              | <b>0.012</b>   | Loss           | 11.2 %  | Ketogenesis, leucine catabolism                                  |
| FABP4   | Fatty acid binding protein 4                     | 0.059                | -              | <b>0.018</b>   | Gain           | 50.9 %  | Fatty acid transport for oxidation                               |
| ECI1    | Enoyl-CoA delta isomerase 1                      | 0.355                | -              | <b>0.025</b>   | WT/loss        | 82.7 %  | Fatty acid beta oxidation of unsaturated fatty acids             |
| HADHA   | Mitochondrial trifunctional protein              | 0.043                | -              | <b>0.031</b>   | Loss           | 13.1 %  | Mitochondrial beta oxidation of long chain fatty acids           |
| CPT1B   | Carnitine palmitoyltransferase I                 | 0.088                | -              | <b>0.040</b>   | Gain           | 5.1 %   | Fatty acid beta oxidation                                        |

**Supplementary Table S8. Genes that were significantly associated with the overall survival of the patients in four different cohorts.** The data is from Supplementary Figure S6 from publication in Nature 474, 609-615, 2011 (Integrated genomic analyses of ovarian carcinoma).

| Name    | Title                                               | TCGA training                           |                 | Bonome (non-TCGA samples)      |                 | Tothill (no stage I)           |                 | Dressman                       |                 |
|---------|-----------------------------------------------------|-----------------------------------------|-----------------|--------------------------------|-----------------|--------------------------------|-----------------|--------------------------------|-----------------|
|         |                                                     | Overall survival Cox (cap 60 m) 9/29/09 | beta            | Overall survival Cox (cap 60m) | beta            | Overall survival Cox (cap 60m) | beta            | Overall survival Cox (cap 60m) | beta            |
| ALDH5A1 | aldehyde dehydrogenase 5 family, member A1          | -0.668                                  | <b>2.29E-04</b> | -0.546                         | <b>2.99E-02</b> | -0.468                         | <b>6.61E-03</b> | -1.078                         | <b>8.19E-05</b> |
| PCK2    | phosphoenolpyruvate carboxykinase 2 (mitochondrial) | -0.650                                  | <b>1.11E-03</b> | -0.629                         | <b>1.59E-03</b> | -0.401                         | <b>1.26E-02</b> | -1.148                         | <b>1.08E-05</b> |
| GMPR    | guanosine monophosphate reductase                   | -0.350                                  | <b>1.13E-03</b> | -0.451                         | <b>6.09E-05</b> | -0.304                         | <b>9.06E-04</b> | -0.348                         | <b>2.38E-02</b> |

## 4 GENE SET ENRICHMENT ANALYSES

### 4.1. Supplementary Tables

**Supplementary Table S9. Statistically significant pathways negatively associated with the expression of *ALDH5A1* gene.** False discovery rate Q-value less than or equal to 0.1 is used as the significance cut off. SIZE = number of genes in the gene set; NES = normalized enrichment score; Q-value = false discovery rate Q-value. P-values less than 0.0001 are shown as 0.000 in the table. With and FDR Q-value cut off 0.1 there were no pathways significantly positively associated with the expression of the *ALDH5A1* gene.

| PATHWAY                                     | SIZE | NES    | P-value | Q-value |
|---------------------------------------------|------|--------|---------|---------|
| KEGG ECM RECEPTOR INTERACTION               | 78   | -2.191 | 0.000   | 0.002   |
| EMT UP-REGULATED                            | 90   | -2.106 | 0.000   | 0.003   |
| KEGG FOCAL ADHESION                         | 182  | -1.991 | 0.000   | 0.018   |
| KEGG HYPERTROPHIC CARDIOMYOPATHY HCM        | 76   | -1.893 | 0.000   | 0.042   |
| KEGG TGF BETA SIGNALING PATHWAY             | 77   | -1.901 | 0.002   | 0.046   |
| KEGG LEUKOCYTE TRANSENDOTHELIAL MIGRATION   | 99   | -1.858 | 0.006   | 0.058   |
| KEGG REGULATION OF ACTIN CYTOSKELETON       | 181  | -1.816 | 0.000   | 0.067   |
| KEGG DILATED CARDIOMYOPATHY                 | 81   | -1.818 | 0.000   | 0.074   |
| KEGG CYTOKINE CYTOKINE RECEPTOR INTERACTION | 214  | -1.747 | 0.011   | 0.096   |
| KEGG GAP JUNCTION                           | 75   | -1.769 | 0.002   | 0.097   |

**Supplementary Table S10. P-values of the association of EMT signatures with ALDH enzymes.** P-values less than 0.0001 are shown as 0.000 in the table.

|          | Positive association with EMT+ | Positive association with EMT- | Negative association with EMT+ | Negative association with EMT- |
|----------|--------------------------------|--------------------------------|--------------------------------|--------------------------------|
| ALDH5A1  |                                |                                | 0.000                          | 0.510                          |
| ALDH1A1  | 0.059                          | 0.992                          |                                |                                |
| ALDH1A2  | 0.025                          |                                |                                | 0.097                          |
| ALDH1A3  | 0.000                          | 0.084                          |                                |                                |
| ALDH1B1  | 0.008                          | 0.030                          |                                |                                |
| ALDH1L1  |                                |                                | 0.036                          | 0.498                          |
| ALDH2    | 0.264                          |                                |                                | 0.418                          |
| ALDH3A1  |                                | 0.977                          | 0.087                          |                                |
| ALDH3A2  |                                |                                | 0.874                          | 0.693                          |
| ALDH3B1  |                                | 0.002                          | 0.146                          |                                |
| ALDH3B2  |                                | 0.000                          | 0.579                          |                                |
| ALDH4A1  |                                |                                | 0.068                          | 0.965                          |
| ALDH6A1  |                                |                                | 0.143                          | 0.731                          |
| ALDH7A1  | 0.932                          |                                |                                | 0.959                          |
| ALDH8A1  |                                |                                | 0.189                          | 0.981                          |
| ALDH9A1  |                                |                                | 0.380                          | 0.516                          |
| ALDH18A1 | 0.178                          |                                |                                | 1.000                          |
